# Supplementary material
Source: PubMed Central journal article supplement (PMC1785258)
Supplement: pnas_0610561104_1.pdf [file pnas_0610561104_1.pdf]

**Cue:** *Imagine that you are standing in the middle of a bustling street market*

**P04:** Well, it shouldn't be difficult for someone who has done it for 24 and a half years [here P04 is referring to his previous job of being a market trader - see Supplementary Methods online]. The surrounding is very pleasant, it's a beautiful day. There's no bad smells, there is no dirt, which is quite unusual. Everything seems to be okay, everything is pleasant. People seem to be quite well disposed and basically there is a sense of [pause] happiness. *And if you look round what can you see?* When I look around I see people, very many people. Most of all... um... not many men, all I see are young ladies. And basically they are all in a hurry, clearly, because they would only have so much time. And... it's a precious moment. [pause] *And what does this market look like?* It could be almost any market, it could be St. Albans, it could be Petticoat Lane, it could be the Roman Road on Saturday, it could be Leather Lane on a Friday, it could be Charter Street when the days were good. *Okay, but what does it look like to you?* Well, it could be a market in Milan. Markets have something in common which is magical and that magic can only be experienced by someone who appreciates that sort of thing. A market is a wonderful place, maybe not for everyone, but on a lovely day I think you'd find as much happiness there as anywhere.

**CON:** Right, okay. So, on either side of me I've got stalls and it's noisy. We have a person on my right who is selling fruit and veg and they're telling us that the bananas are on special offer this week and they're shouting about that. On my left side I've got somebody selling china and he's trying to do the same thing. He's very keen you buy from him, 2 for 1 pound, that sort of thing. And further on you've got a guy selling suitcases and then somebody else selling some hardware stuff and a bit further on somebody selling fabric and there's somebody else on this side selling clothes. The people selling the fruit and veg are selling it off of something that looks like a cart and has got wheels, sort of parallel to where I'm looking. And everything has got an awning over it; they've all got their own individual covers. For some reason it feels quite narrow, but probably not as narrow as I think it is but more because of the number of people around and the sort of bustling that's going on. *So what does the market look like?* It's in a street and on this side there's a wall and on the other side a lot of the stalls are actually the fronts of shops, so they're actually part of the shop and it's got a sort of cobbled floor...[continues]...
