# Supplementary material
Source: PubMed Central journal article supplement (PMC1785258)

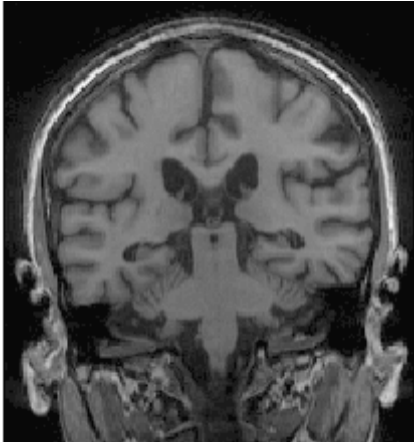

Supplement: pnas_0610561104_7.pdf [file pnas_0610561104_7.pdf]
